# Supplementary material
Source: PubMed Central journal article supplement (PMC6103246)
Supplement: Supp_Data.pdf [file Supp_Data.pdf]

## Online-Only Supplements

eFigure1. Network Efficiency.

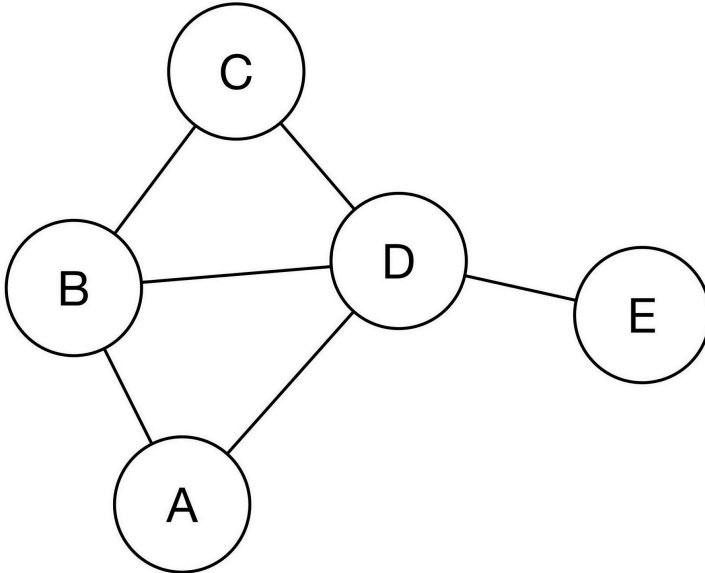

$$E_{glob} = 1/n(n-1) \sum_{i,j} d(v_i, v_j)$$

$$E_{loc} = 1/n \sum E(G_i)$$

Efficient information exchange between brain regions is assumed to follow the shortest path between those regions. As illustrated here, there are several possible paths or routes from region A to region E with A→D→E being the shortest or most efficient. Global efficiency ( $E_{glob}$ ) of a network is defined as the average inverse shortest path length across all regions in the network where  $n$  is the number of regions and  $d(v_i, v_j)$  is the length of the shortest path between regions  $i$  and  $j$ . Local efficiency is the average efficiency ( $E$ ) of the local subgraphs ( $G_i$ ).

**eTable 1. Neurocognitive testing z-scores. Data are shown as mean (standard deviation).**

| Test Name                       | Non-impaird (N = 100) | Impaired (N = 61) | Test Reference |
|---------------------------------|-----------------------|-------------------|----------------|
| 20Q Abstraction                 | 0.057 (1.001)         | -0.546 (0.901)    | <sup>1</sup>   |
| 20Q Achievement                 | 0.060 (0.862)         | -0.322 (0.951)    | <sup>1</sup>   |
| Color-Word Inhibition Switching | 0.104 (0.869)         | -0.546 (0.963)    | <sup>1</sup>   |
| Trails Number-Letter Switching  | 0.170 (0.604)         | -1.508 (1.131)    | <sup>1</sup>   |
| Letter Fluency                  | 0.060 (0.800)         | -1.055 (0.775)    | <sup>1</sup>   |
| Rey Complex Figure Copy         | -1.494 (1.899)        | -3.585 (2.474)    | <sup>2</sup>   |
| Block Design                    | 0.025 (0.857)         | -0.680 (0.986)    | <sup>3,4</sup> |
| Digits Back                     | -0.040 (0.942)        | -0.628 (1.006)    | <sup>3,4</sup> |
| Digits Forward                  | -0.150 (1.048)        | -0.678 (0.839)    | <sup>3,4</sup> |
| Digit Symbol                    | -0.047 (0.908)        | -0.792 (0.895)    | <sup>3,4</sup> |
| Spatial Span Forward            | 0.097 (0.898)         | -0.590 (0.787)    | <sup>3,4</sup> |

**eTable 2. Partial correlations between functional connectome efficiencies and executive function tests**

| Global Efficiency               | R    | p      | Local Efficiency                | R     | p      | Regional Efficiency             | R     | p     |
|---------------------------------|------|--------|---------------------------------|-------|--------|---------------------------------|-------|-------|
| 20Q Abstraction                 | 0.29 | 0.004* | 20Q Abstraction                 | -0.28 | 0.005* | 20Q Abstraction                 | -0.15 | 0.151 |
| 20Q Achievement                 | 0.23 | 0.023  | 20Q Achievement                 | -0.2  | 0.051  | 20Q Achievement                 |       |       |
| Color-Word Inhibition Switching | 0.04 | 0.722  | Color-Word Inhibition Switching | -0.02 | 0.814  | Color-Word Inhibition Switching |       |       |
| Trails Number-Letter Switching  | 0.1  | 0.33   | Trails Number-Letter Switching  | -0.07 | 0.523  | Trails Number-Letter Switching  |       |       |
| Letter Fluency                  | 0.28 | 0.006* | Letter Fluency                  | -0.3  | 0.003* | Letter Fluency                  | -0.18 | 0.073 |
| Rey Complex Figure Copy         | 0.19 | 0.059  | Rey Complex Figure Copy         | -0.1  | 0.326  | Rey Complex Figure Copy         |       |       |
| Block Design                    | 0.15 | 0.15   | Block Design                    | -0.13 | 0.187  | Block Design                    |       |       |
| Digits Back                     | 0.18 | 0.083  | Digits Back                     | -0.05 | 0.642  | Digits Back                     |       |       |

|                      |      |        |                      |       |        |                      |      |           |
|----------------------|------|--------|----------------------|-------|--------|----------------------|------|-----------|
| Digits Forward       | 0.31 | 0.002* | Digits Forward       | -0.31 | 0.002* | Digits Forward       | -0.4 | < 0.0001* |
| Digit Symbol         | 0.11 | 0.29   | Digit Symbol         | -0.11 | 0.3    | Digit Symbol         |      |           |
| Spatial Span Forward | 0.1  | 0.32   | Spatial Span Forward | -0.06 | 0.529  | Spatial Span Forward |      |           |

*Footnote.* \*p value survives correction for multiple comparisons

**eTable 3. Partial correlations between structural connectome efficiencies and executive function tests**

| <b>Global Efficiency:</b>       | <b>R</b> | <b>p</b> | <b>Local Efficiency</b> | <b>R</b> | <b>p</b> |
|---------------------------------|----------|----------|-------------------------|----------|----------|
| 20Q Abstraction                 | -0.03    | 0.683    |                         | -0.05    | 0.552    |
| 20Q Achievement                 | -0.1     | 0.231    |                         | -0.167   | 0.039    |
| Color-Word Inhibition Switching | 0.153    | 0.061    |                         | 0.19     | 0.021    |
| Trails Number-Letter Switching  | 0.01     | 0.876    |                         | 0.04     | 0.667    |
| Letter Fluency                  | 0.04     | 0.656    |                         | 0.08     | 0.328    |
| Rey Complex Figure Copy         | -0.05    | 0.552    |                         | -0.03    | 0.726    |
| Block Design                    | -0.19    | 0.02     |                         | -0.15    | 0.063    |
| Digits Back                     | -0.04    | 0.648    |                         | 0.02     | 0.784    |
| Digits Forward                  | 0.06     | 0.432    |                         | 0.07     | 0.413    |
| Digit Symbol                    | 0.06     | 0.445    |                         | 0.11     | 0.165    |
| Spatial Span Forward            | 0.03     | 0.746    |                         | 0.15     | 0.062    |

*Footnote.* No p values survived correction for multiple comparisons

### **Online-Only References**

1. Delis DC, Kaplan E, Kramer JH. Delis-Kaplan Executive Function System. San Antonio, TX: Psychological Corp; 2008.
2. Rey A, Osterrieth P. Translations of excerpts from Andre Rey" s Psychological examination of traumatic encephalopathy and PA Osterrieth" s The Complex Figure Copy Test. Clinical Neuropsychologist 1993.
3. Wechsler D. Wechsler Intelligence Scale for Children Fourth Edition. San Antonio: The Psychological Corporation; 2003.
4. Wechsler D. Wechsler Adult Intelligence Scale Fourth Edition. San Antonio, TX: The Psychological Corporation; 2008.
